1  
2  
3  
4  
5  
6  
7  
8  
9  
10  
11  
12  
13  
14

**Last and corresponding authorship practices in ecology**

Meghan A. Duffy

Department of Ecology and Evolutionary Biology

University of Michigan

Ann Arbor, MI 48109

[duffymeg@umich.edu](mailto:duffymeg@umich.edu)

Preprint submitted to BioRxiv April 12, 2017

15 **Abstract**

16 Authorship is intended to convey information regarding credit and responsibility for manuscripts.  
17 However, while there is general agreement within ecology that the first author is the person who  
18 contributed the most to a particular project, there is less agreement regarding whether being last  
19 author is a position of significance and regarding what is indicated by someone being the  
20 corresponding author on a manuscript. Here, I use a combination of a survey and an analysis of  
21 the literature to show that: 1) most ecologists view the last author as the “senior” author on a  
22 paper (that is, the person who runs the lab in which most of the work was carried out), 2) 82% of  
23 papers published in 2016 in the first and/or second issues of *American Naturalist*, *Ecology*, and  
24 *Evolution* had the first author as corresponding author, and 3) most ecologists view the  
25 corresponding author as the person taking full responsibility for a paper. However, there was  
26 substantial variation in views on authorship, especially corresponding authorship. Given these  
27 results, I suggest that discussions of authorship have as their starting point that the first author  
28 will be corresponding author and the senior author will be last author, while noting that it will be  
29 necessary in some cases to deviate from these defaults.

## 30 **Introduction**

31           Who is the last author on a paper? Depending on authorship conventions in a field, the  
32 last author might be the person whose surname comes last alphabetically, the person who runs  
33 the lab group where the research was done, or simply the person who did the least work on the  
34 project (Tschardt et al. 2007). In math, for example, authorship tends to be determined  
35 alphabetically (Waltman 2012), whereas in biomedical fields, the last author position is one that  
36 tends to carry extra weight (Moulopoulos et al. 1983, Wren et al. 2007, Venkatraman 2010). In  
37 ecology, alphabetical author lists are not the norm, but standard authorship practices have  
38 received relatively little study. Thus, we are in a similar situation to the one described in 1997 by  
39 Rennie et al. when they discussed order of authorship and what it conveys: “Everyone is equally  
40 sure about their own system; the point is that none of these schemes is actually disclosed, so the  
41 readers, to whom this should be addressed, are not let in on the secret: they have not been told  
42 which code book to use and how it works.” The goal of this study is to describe the current  
43 systems in use by ecologists regarding last and corresponding authorship, to see whether certain  
44 factors (e.g., research area, career stage) are associated with those views, and to see if the  
45 number of authors and the position of the corresponding author have changed over time.

46           As noted in an earlier publication on this topic (Tschardt et al. 2007), the first author of  
47 an ecology paper is generally the person who made the greatest overall contribution to the work,  
48 but there is no consensus on how to determine the order of the remaining authors. In a survey of  
49 57 ecologists at the 2004 meeting of the Ecological Society of America, respondents gave ten  
50 unique authorship order combinations for a scenario involving only three potential coauthors  
51 (Weltzin et al. 2006). There is also confusion over what is signified by corresponding authorship  
52 (Laurance 2006).

53           This is problematic for two reasons. First, people are judged based on their publication  
54 records, meaning that unclear authorship criteria make it difficult to determine how much credit  
55 an author should get for a publication (Tschardt et al. 2007, Wren et al. 2007, Eggert 2011).  
56 Job applications, grant proposals, and tenure and promotion decisions are all impacted by  
57 publication records. If people judging these applications, proposals, and dossiers have different  
58 views on what it means to be last or corresponding author, that means those are not reliable  
59 signals. This can be problematic if, for example, an assistant professor puts herself as last author  
60 as an indicator of having led the work, but a tenure letter writer perceives her as last because she  
61 did the least work. Second, authorship on a publication entails not just credit for the work, but  
62 responsibility for it as well (Rennie et al. 2000, Venkatraman 2010, Eggert 2011). In cases where  
63 concerns about research are raised, it is important to know, for example, if corresponding  
64 authorship indicates that someone is taking full responsibility for the publication.

65           In this study, I first present results of a survey of scientists (80% of whom identified  
66 ecology as their primary research area) that asked about views on last and corresponding  
67 authorship. In addition to giving information on overall views of ecologists on last and  
68 corresponding authorship, the survey allowed me to explore whether factors such as research  
69 subfield, time since PhD, geographic location, and amount of interdisciplinary work were  
70 associated with views on last and corresponding authorship. I also present data on the number of  
71 authors over time as well as the position of the corresponding author over time in three journals  
72 (*American Naturalist*, *Ecology*, and *Evolution*). I end by suggesting that, since most readers  
73 expect authors to use a first-last author emphasis (FLAE, sensu Tschardt et al. 2007) and since  
74 the vast majority of papers in *American Naturalist*, *Ecology*, and *Evolution* have the first author  
75 as the corresponding author, those are good starting places for discussions regarding author order

76 and corresponding authorship (while recognizing that there will be situations where it is  
77 desirable or necessary to deviate from this).

78

## 79 **Methods**

### 80 *Poll*

81 I carried out a poll of readers of the *Dynamic Ecology* blog. In addition to appearing on the blog,  
82 the poll was advertised via social media and thus likely reached a wider readership than a typical  
83 blog post. The poll first appeared on 6 April 2016 and ran for two weeks. After removing four  
84 blank responses, there were 1122 responses to the poll.

85 The poll had four main questions: 1) For ecology papers, do you consider the last author  
86 to be the senior author? 2) Which of the following statements most closely matches the current  
87 norms in ecology in terms of who is corresponding author? 3) Which of the following statements  
88 would be best practice in terms of who is corresponding author? and 4) If someone includes a  
89 statement on his/her CV indicating they have used a first/last author emphasis, do you pay  
90 attention to that? The poll also asked about the respondent's primary research area, whether their  
91 research is primarily basic or applied, how frequently they conduct interdisciplinary research,  
92 how many years post-PhD they are, where they live, and what their current department is. The  
93 full survey, including the questions and all the answer options, is given in the Supplement.

94 In addition to presenting the overall responses to the four main questions, I used the  
95 additional information on research area, geographic location, years since degree, department  
96 type, and amount of interdisciplinary work to look for factors associated with views on last and  
97 corresponding authorship. Prior to doing those analyses, I decided that a difference between two  
98 groups in their views on authorship had to be at least 10% in order to be considered notable.

99 While this threshold is somewhat arbitrary, it helped ensure that small differences weren't  
100 overinterpreted.

101

102 *Literature survey*

103 I reviewed the first or second issue of the journal *Ecology* every ten years from 1956-  
104 1996 and every five years thereafter. In most years, I looked at the first issue but, in two cases,  
105 the first issue contained a special feature. In order to avoid any potential confounding effects of  
106 those features, I looked at the second issue in those two cases. I supplemented this analysis with  
107 a similar analysis of papers in the first issue of *Evolution* and the first and second issues of  
108 *American Naturalist* every five years from 2001-2016. (Each *American Naturalist* issue contains  
109 fewer papers, hence using two issues per year.) For each paper, I recorded the number of authors  
110 as well as the position of the corresponding author. *Ecology* began including author email  
111 addresses in the late 1990s. Thus, for 1956-1996, I noted whether there was a note indicating to  
112 whom correspondence (or reprint requests) should be sent. For 2001-2016, I determined  
113 corresponding authorship based on the following criteria: 1) If an email address was given for  
114 only one author, I indicated that person as the corresponding author. 2) In some cases, email  
115 addresses were given for multiple authors but one author was indicated as the one to whom  
116 correspondence should be addressed; in these cases, only the author designated for  
117 correspondence was considered the corresponding author. 3) If the email addresses were given  
118 for multiple authors and there was no note regarding correspondence, I considered all the authors  
119 who had email addresses as corresponding author. 4) In a few cases, no author had an email  
120 address; in these cases, I said that the corresponding author was not designated. Corresponding  
121 authorship was then grouped into six categories: 1) "first" (the first or only author in the author

122 string was the corresponding author), 2) “middle” (someone other than the first or last author was  
123 the corresponding author), 3) “last” (the last author was corresponding author), 4) “ND” (when  
124 corresponding authorship was not designated), 5) “all” (when both – for papers with only two  
125 authors – or all of the authors on a paper were corresponding author), and 6) “other” (when some  
126 other combination of authors – such as the first and last – were corresponding author).

127

### 128 *Data and code*

129 Figures were made in R (v3.3.3) using the ggplot, cowplot, and Likert packages. Data and code  
130 for the analyses and plots of the poll and the literature survey are available at:

131 <https://github.com/duffymeg/DEAuthorshipPoll>

132

## 133 **Results**

### 134 *Demographics of poll respondents*

135 80% of respondents indicated that ecology was their primary research field (Table 1). Most poll  
136 respondents were current students (28%) or received their PhD within the past 1-5 years (31%),  
137 but respondents included people in all categories, including those who received their PhD over  
138 20 years ago (Table 2). The vast majority of the poll respondents live in North America (64%) or  
139 Europe (26%; Table 3).

140

### 141 *Views on last authorship*

142 For ecology papers, most respondents viewed the last author as the senior author (that is, the lab  
143 head or principle investigator; Figure 1A). However, this view is not unanimous: the three “no”-  
144 related answers garnered 14% of the responses. One way of possibly reducing confusion about

145 whether the last author is the senior author would be to include a note on one's CV indicating  
146 that the last author position is one of emphasis. However, the poll results suggest this is likely to  
147 only be partially effective – 29% of respondents said they do not or would not pay attention to  
148 these statements (Figure 1B).

149         Year of degree (as a proxy for career stage) did not strongly influence views on last  
150 authorship (Figure 2A); aside from the small group of respondents who do not have PhDs and  
151 are not current students, there was very little variation. North American respondents were more  
152 likely to say the last author is not the senior author, as compared to Europeans (18% “no”  
153 responses vs. 5%, respectively; Figure 2B). Looking at primary research area, the two evolution  
154 categories had the highest proportion of positive responses to the question about whether the last  
155 author was the senior author, with ecologists being somewhat less likely to give one of the “yes”  
156 responses (as compared to evolutionary biologists; Figure 2C). People in Biology and EEB  
157 departments were more likely to view the last author as the senior author, compared to those in  
158 Natural Resources departments or other types of departments (Figure 2D). Finally, while there  
159 was no notable difference based on whether someone did basic vs. applied research (Figure 2E),  
160 there was a monotonic decrease in the “yes” responses with increasing frequency of  
161 interdisciplinary research: 90% of those who never do interdisciplinary research view the last  
162 author as the senior author, as compared to only 78% of those who always do interdisciplinary  
163 research (Figure 2F).

164

### 165 *Views on corresponding authorship*

166 There was substantial variation in respondents' views on current and best practices for  
167 corresponding authorship (Figure 3). Most respondents (54%) said that the corresponding author



168 “uploaded the files, managed the revisions and wrote the response to reviewers, and took  
169 responsibility for the paper after publication”. The next most common response (19% of  
170 respondents) was that the current practice is that the corresponding author is the person who  
171 simply uploaded the files – though only 8% viewed this as best practice. Only 7% said that the  
172 current practice is that the corresponding author is the senior author.

173 More senior respondents (those who received their PhDs 11 or more years ago) were less  
174 likely to choose the “full responsibility” option (that is, to say the corresponding author  
175 “uploaded the files, managed the revisions and wrote the response to reviewers, and took  
176 responsibility for the paper after publication”; Figure 4A). Evolutionary biologists were  
177 somewhat less likely to choose the “full responsibility” option than ecologists (46% vs. 55%,  
178 respectively; Figure 4B). People in EEB departments were more likely to choose the “full  
179 responsibility” option than those in Biology departments (60% vs. 50%, respectively; Figure  
180 4C). There were no notable differences in the ways people in Europe vs. North America viewed  
181 current corresponding authorship practices (Figure 4D).

182

### 183 *Authorship over time*

184 The number of authors on *Ecology* papers is increasing over time, with a particularly notable  
185 uptick after 1996 (Figure 5A). Between 1956 and 1996, the corresponding author on a paper was  
186 not usually indicated and mailing addresses for all authors were given. Of the 129 papers  
187 analyzed during that window, only two indicated the author to whom correspondence should be  
188 addressed. Interestingly, in one of these cases (Kalisz and Teeri 1986) the first author was  
189 indicated, whereas in the other (Murcia and Feinsinger 1996) the second author was indicated.

190           Since 2001, the proportion of first authors as corresponding author has increased in  
191 *American Naturalist* and *Evolution*, but remained stable in *Ecology*. In 2001 and 2006, it was  
192 fairly common for email addresses to be given for no authors, for all authors, for just a middle  
193 author, or for multiple authors (e.g., first and third authors). For the 2016 papers analyzed, the  
194 corresponding author was almost always the first or last author.

195

## 196 **Discussion**

197           Most ecologists view the last author as a position of emphasis in a paper, though this  
198 view is not universal. Most ecologists view the corresponding author as the person taking full  
199 responsibility for a paper, but, again, the survey revealed variation in views regarding current  
200 and best practices for corresponding authorship. Prior to the late 1990s, it was rare for the  
201 corresponding author of a paper to be designated; at present, the first author is usually the  
202 corresponding author, with the last author being the corresponding author in a minority of cases.  
203 Overall, there is variation in views on corresponding and last authorship in ecology, and the field  
204 would benefit from greater consensus on what is signified by corresponding and last authorship.

205           At the risk of stating the obvious, decisions about who should be last and/or  
206 corresponding author are only necessary if there is more than one author. Thus, the trend in  
207 ecology towards having more authors on papers (Figure 5), as also seen by others (Johnson 2006,  
208 Weltzin et al. 2006, Fox et al. 2016, Logan 2016), means that there are more decisions to be  
209 made regarding authorship, including last and corresponding authorship.

210           Over the past several decades, various systems for attempting to indicate how much  
211 different authors contributed to multiauthor papers have been proposed (e.g., Davis and  
212 Gregerman 1969, Mouloupoulos et al. 1983, Rennie et al. 1997, Weltzin et al. 2006). A common

213 suggestion is to use author contribution statements (e.g., Mouloupoulos et al. 1983, Rennie et al.  
214 1997, Cozzarelli 2004). While author contribution statements do have the potential to remove  
215 ambiguity about whether the last author is a position of emphasis, they have several problems  
216 themselves. First, unless the full author contribution statements are put on a CV for every  
217 publication, people reviewing job, grant, or award applications are unlikely to see them  
218 (especially at earlier stages of screening). Second, and more problematically, people do not  
219 necessarily trust author contribution statements (Venkatraman 2010, Fox 2016): in a different  
220 poll done on the Dynamic Ecology blog, only 41% of respondents indicated that author  
221 contribution statements are always or usually accurate in their experience (Fox 2016).

222       Thus, attempting to infer the contributions of different authors from the order of  
223 authorship is likely to continue. The results of this survey demonstrate that, at present, most  
224 ecologists tend to view the last author as the senior author (Figure 1). Therefore, when discussing  
225 authorship, ecologists should assume that most people will interpret authorship order assuming a  
226 first-last author emphasis (FLAE), viewing the last author as the senior author. As a result, I  
227 recommend that discussions regarding authorship should have as their starting point that the  
228 senior author will be the last author. However, a problem arises when multiple groups  
229 collaborate, making it so that there is not one “senior” author. In some fields, footnotes  
230 indicating multiple last authors have started to become more common, but such footnotes are not  
231 currently common in ecology. A recent study found that only ~25% of last authors in the journal  
232 *Functional Ecology* were women (Fox et al. 2016). It is likely that at least some of this pattern  
233 can be attributed to women being more likely to leave science, leading to fewer women as senior  
234 authors (Fox et al. 2016). At the same time, the same biases that contribute to women  
235 disproportionately leaving science (e.g., Moss-Racusin et al. 2012)) might also influence

236 decisions regarding which author is viewed as “senior” (and, therefore, in the emphasized last  
237 author position). Given the continued potential for confusion regarding what is conveyed by  
238 authorship order – especially in more complicated situations arising from collaborations between  
239 multiple groups – and given the high stakes of tenure and promotion decisions, it might be  
240 advisable to include a short paragraph in the dossier that describes the authorship system that  
241 was used (e.g., a first-last author emphasis system) and noting exceptions (e.g., for a high profile  
242 paper based on work done in several different labs).

243         Of the papers published in 2016 that were examined for this study, 82% had the first  
244 author as the corresponding author. Based on the survey results, most people will assume that  
245 this person “uploaded the files, managed the revisions and wrote the response to reviewers, and  
246 took responsibility for the paper after publication”, but 19% will think it simply means that that  
247 is the person who uploaded the files. Thus, there is substantial variation in how people view  
248 corresponding authorship, including whether it is viewed as something that indicates something  
249 larger about responsibility for the work reported in the manuscript. Further work on this topic –  
250 especially studies that collect qualitative data on the topic – would be useful for understanding  
251 current views on corresponding authorship. One potential focus for such studies is whether  
252 corresponding authorship is perceived differently depending on whether the corresponding  
253 author is the first or last author, as was found in a survey of medical school department chairs  
254 (Bhandari et al. 2014). Based on the combination of poll results and current corresponding  
255 authorship practices, a reasonable starting point for discussions of authorship on ecology articles  
256 would be to have the lead author be the corresponding author on a paper noting that, in doing so,  
257 many readers will assume that means that person is taking full responsibility for the paper.

258 Authorship carries with it both credit and responsibility, and the order of authorship can  
259 convey information about how much credit and responsibility an author of a multi-authored  
260 paper deserves. However, because of variation across fields and over time, what is indicated by  
261 last authorship and corresponding authorship is not necessarily clear. My analyses indicate that  
262 most ecologists view the last author as the “senior” author on a paper (that is, the head of the lab  
263 where the majority of the work was carried out), that the first author tends to be the  
264 corresponding author on ecology papers, and that most ecologists interpret corresponding  
265 authorship as taking full responsibility for a paper. Thus, in addition to agreeing with earlier calls  
266 to discuss authorship early and often (Weltzin et al. 2006), I suggest that those discussions have  
267 as their starting point that the last author is the senior author and the first author is the  
268 corresponding author.

269

## 270 **Acknowledgments**

271 This poll was confirmed as exempt from ongoing IRB review (UMich IRB #: HUM00114140).  
272 The poll was developed with input from Alex Bond, Linda Campbell, Kathy Cottingham, and  
273 Andrea Kirkwood, who all helped me think through what to ask about and how to phrase the  
274 questions and answer options. Thanks to Rayna Harris for introducing me to the Likert package  
275 and providing code for the initial version of Figure 2.

276

## 277 **Literature Cited**

278 Bhandari, M., G. H. Guyatt, A. V. Kulkarni, P. J. Devereaux, P. Leece, S. Bajammal, D. Heels-  
279 Ansdell, and J. W. Busse. 2014. Perceptions of authors' contributions are influenced by

- 280 both byline order and designation of corresponding author. *Journal of Clinical*  
281 *Epidemiology* **67**:1049-1054.
- 282 Cozzarelli, N. R. 2004. Responsible authorship of papers in PNAS. *Proceedings of the National*  
283 *Academy of Sciences of the United States of America* **101**:10495.
- 284 Davis , P. J., and R. I. Gregerman 1969. Parse Analysis: A New Method for the Evaluation of  
285 Investigators' Bibliographies. *New England Journal of Medicine* **281**:989-990.
- 286 Eggert, L. D. 2011. Best practices for allocating appropriate credit and responsibility to authors  
287 of multi-authored articles. *Frontiers in Psychology* **2**:6.
- 288 Fox, C. W., C. S. Burns, A. D. Muncy, and J. A. Meyer. 2016. Gender differences in patterns of  
289 authorship do not affect peer review outcomes at an ecology journal. *Functional Ecology*  
290 **30**:126-139.
- 291 Fox, J. W. 2016. Views on authorship and author contribution statements: poll results, part 2.  
292 *Dynamic Ecology*.
- 293 Johnson, S. 2006. Are ecologists becoming more gregarious? *Bulletin of the British Ecological*  
294 *Society* **37**:23.
- 295 Kalisz, S., and J. A. Teeri. 1986. Population-Level Variation in Photosynthetic Metabolism and  
296 Growth in *Sedum Wrightii*. *Ecology* **67**:20-26.
- 297 Laurance, W. F. 2006. Second thoughts on who goes where in author lists. *Nature* **442**:26-26.
- 298 Logan, J. M. 2016. Historical changes in co-author numbers in ecology. *Frontiers in Ecology and*  
299 *the Environment* **14**:297-299.
- 300 Moss-Racusin, C. A., J. F. Dovidio, V. L. Brescoll, M. J. Graham, and J. Handelsman. 2012.  
301 Science faculty's subtle gender biases favor male students. *Proceedings of the National*  
302 *Academy of Sciences* **109**:16474-16479.

- 303 Moulopoulos, S. D., D. A. Sideris, and K. A. Georgilis. 1983. Individual contributions to  
304 multiauthor papers. *British Medical Journal* **287**:1608-1610.
- 305 Murcia, C., and P. Feinsinger. 1996. Interspecific Pollen Loss by Hummingbirds Visiting Flower  
306 Mixtures: Effects of Floral Architecture. *Ecology* **77**:550-560.
- 307 Rennie, D., A. Flanagan, and V. Yank. 2000. The contributions of authors. *Jama-Journal of the*  
308 *American Medical Association* **284**:89-91.
- 309 Rennie, D., V. Yank, and L. Emanuel. 1997. When authorship fails - A proposal to make  
310 contributors accountable. *Jama-Journal of the American Medical Association* **278**:579-  
311 585.
- 312 Tschamtko, T., M. E. Hochberg, T. A. Rand, V. H. Resh, and J. Krauss. 2007. Author Sequence  
313 and Credit for Contributions in Multiauthored Publications. *Plos Biology* **5**:e18.
- 314 Venkatraman, V. 2010. Conventions of scientific authorship. *Science*.
- 315 Waltman, L. 2012. An empirical analysis of the use of alphabetical authorship in scientific  
316 publishing. *Journal of Informetrics* **6**:700-711.
- 317 Weltzin, J. F., R. T. Belote, L. T. Williams, J. K. Keller, and E. C. Engel. 2006. Authorship in  
318 ecology: attribution, accountability, and responsibility. *Frontiers in Ecology and the*  
319 *Environment* **4**:435-441.
- 320 Wren, J. D., K. Z. Kozak, K. R. Johnson, S. J. Deakyne, L. M. Schilling, and R. P. Dellavalle.  
321 2007. The write position - A survey of perceived contributions to papers based on byline  
322 position and number of authors. *Embo Reports* **8**:988-991.

323

324

325

326 **Table 1.** Primary research area of respondents to poll on last and corresponding authorship,  
327 sorted in decreasing order of commonness.

| <b>Primary Research Area</b>                                   | <b>%</b> |
|----------------------------------------------------------------|----------|
| ecology (primarily field-based)                                | 50       |
| ecology (primarily computational-based)                        | 19       |
| evolutionary biology (primarily organismal)                    | 12       |
| ecology (primarily wet-lab based, including molecular ecology) | 11       |
| evolutionary biology (primarily molecular)                     | 5        |
| biology other than EEB                                         | 2        |
| outside biology                                                | 2        |

328

329 **Table 2.** Number of years since receiving PhD for poll respondents.

| <b>Years since PhD</b>                  | <b>%</b> |
|-----------------------------------------|----------|
| 0 (current students should choose this) | 28       |
| 1-5                                     | 31       |
| 6-10                                    | 18       |
| 11-15                                   | 12       |
| 16-20                                   | 5        |
| >20                                     | 5        |
| no PhD and not a current student        | 2        |

330

331 **Table 3.** Geographic location of poll respondents, sorted alphabetically.

| <b>Continent</b> | <b>%</b> |
|------------------|----------|
| Africa           | 1        |
| Asia             | 1        |
| Australia        | 6        |
| Europe           | 26       |
| North America    | 64       |
| South America    | 3        |

332

333



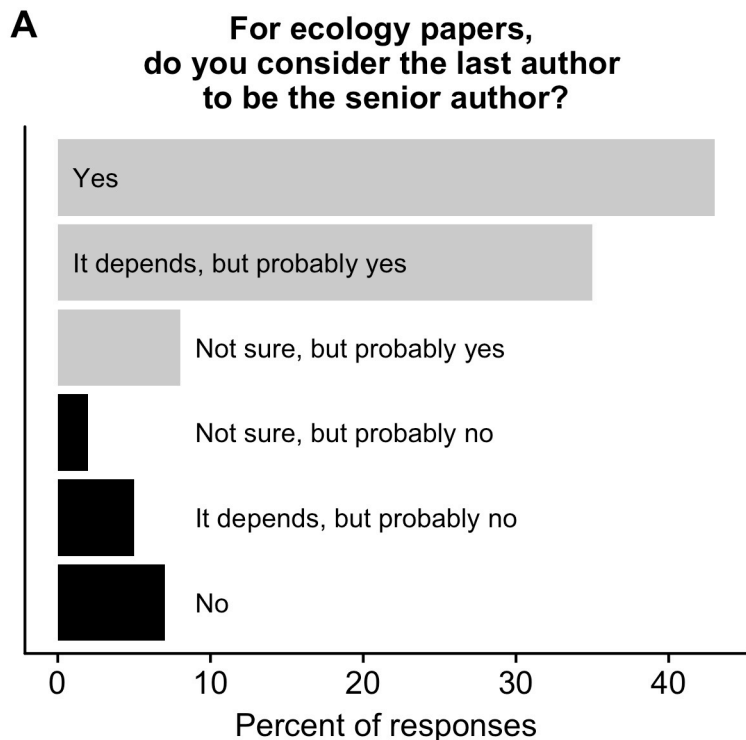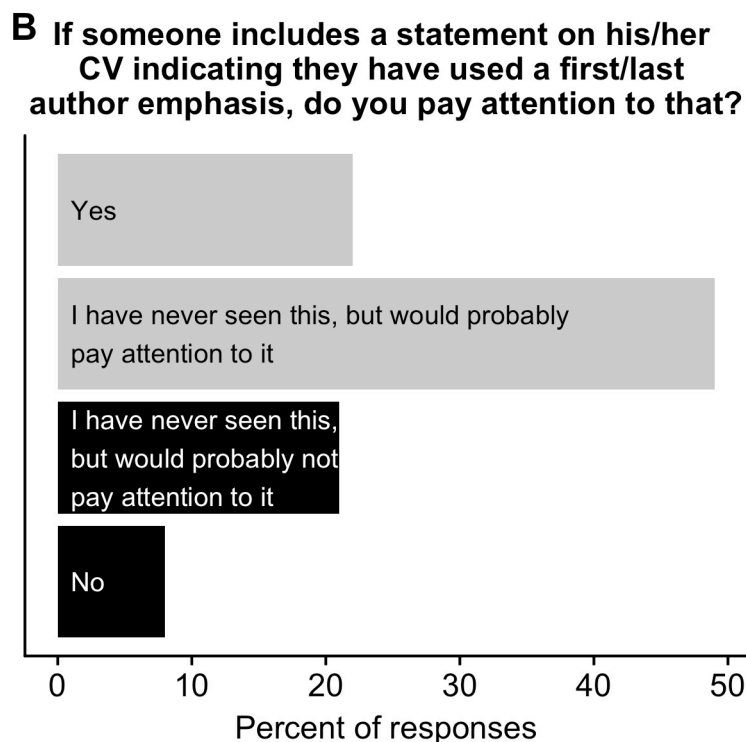

334

335 **Figure 1.** Views of poll respondents on A) whether the last author of a paper is the senior author  
336 and B) whether they would pay attention to a statement on the CV indicating that the last author  
337 position was one of emphasis.  
338

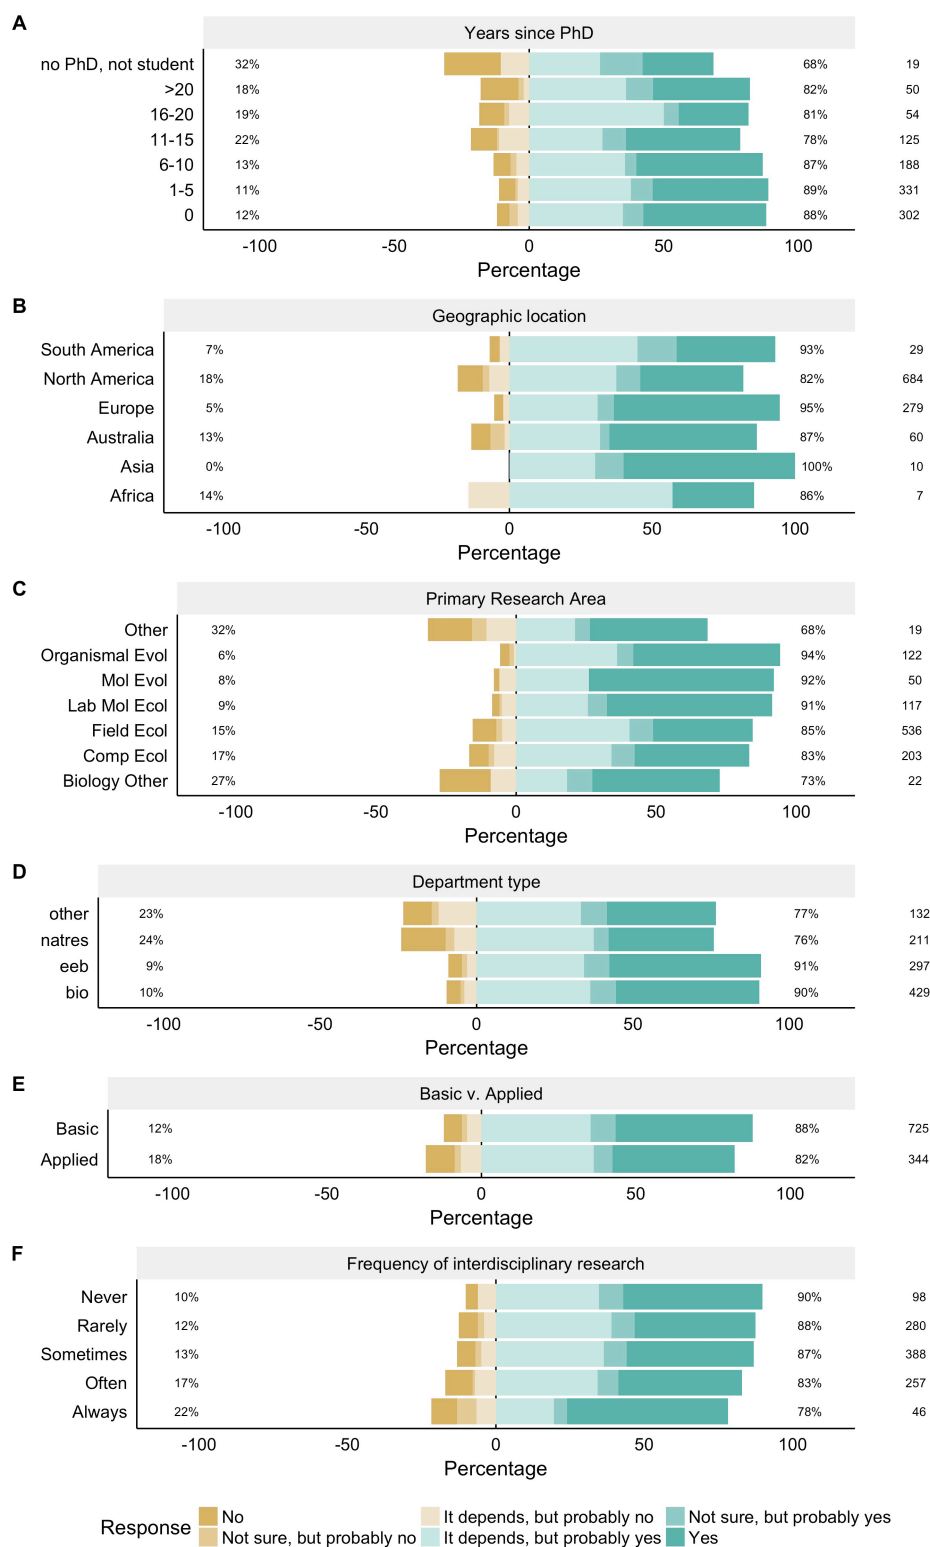

339  
340  
341  
342  
343

**Figure 2.** Variation in views on last authorship by career stage, geographic location, research area, and department type. The bars shaded in greens are positive responses to the question “For ecology papers, do you consider the last author to be the senior author”, whereas gold responses are negative responses (as described in the figure legend). The percentage on the right gives the

344 total percentage of positive responses, while the percentage on the left gives the total percentage  
345 of negative responses for a group. The number on the right hand side shows the number of  
346 respondents in a given category (e.g., 29 respondents indicated that they live in South America).  
347

348

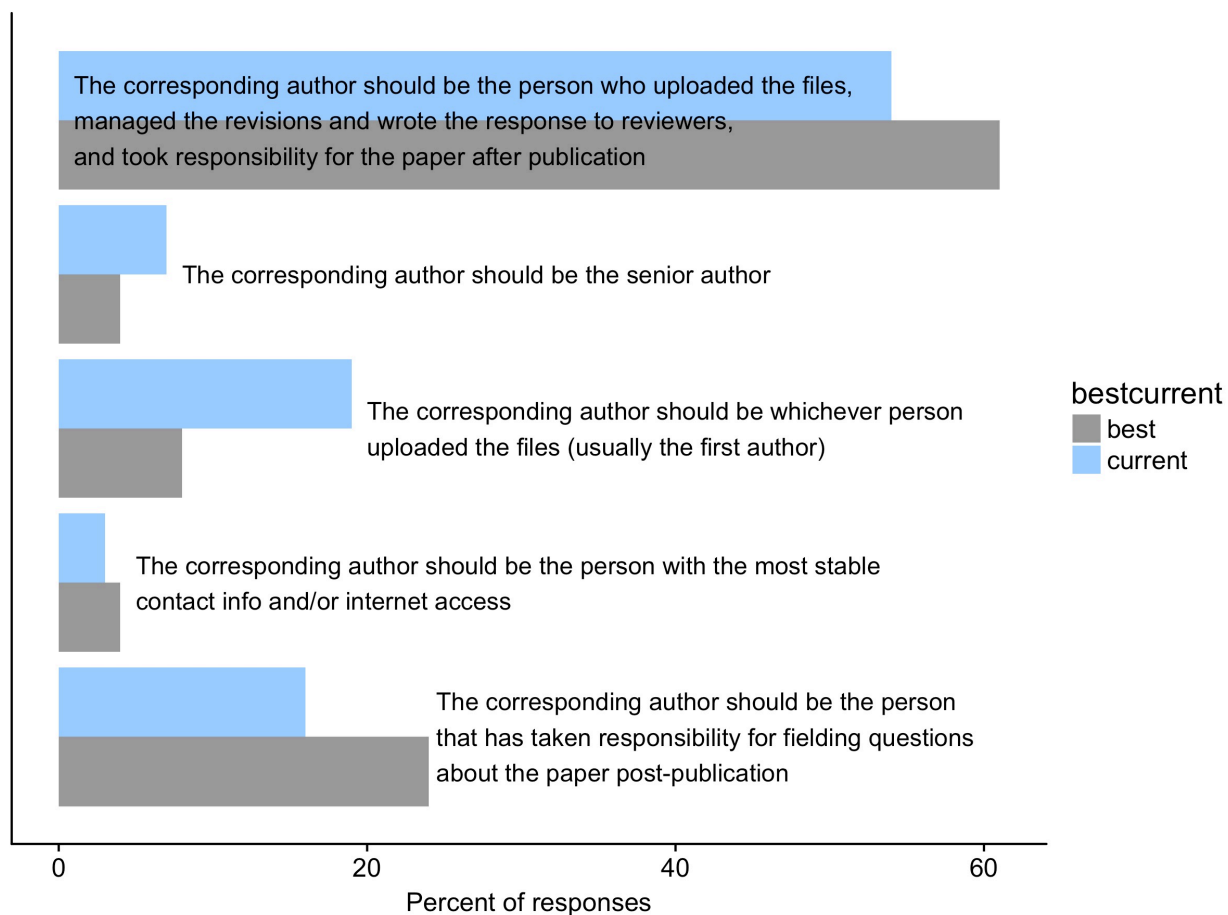

349

350

351 **Figure 3.** Views of poll respondents on current (light blue) and best (gray) practices for  
352 corresponding authorship.

353

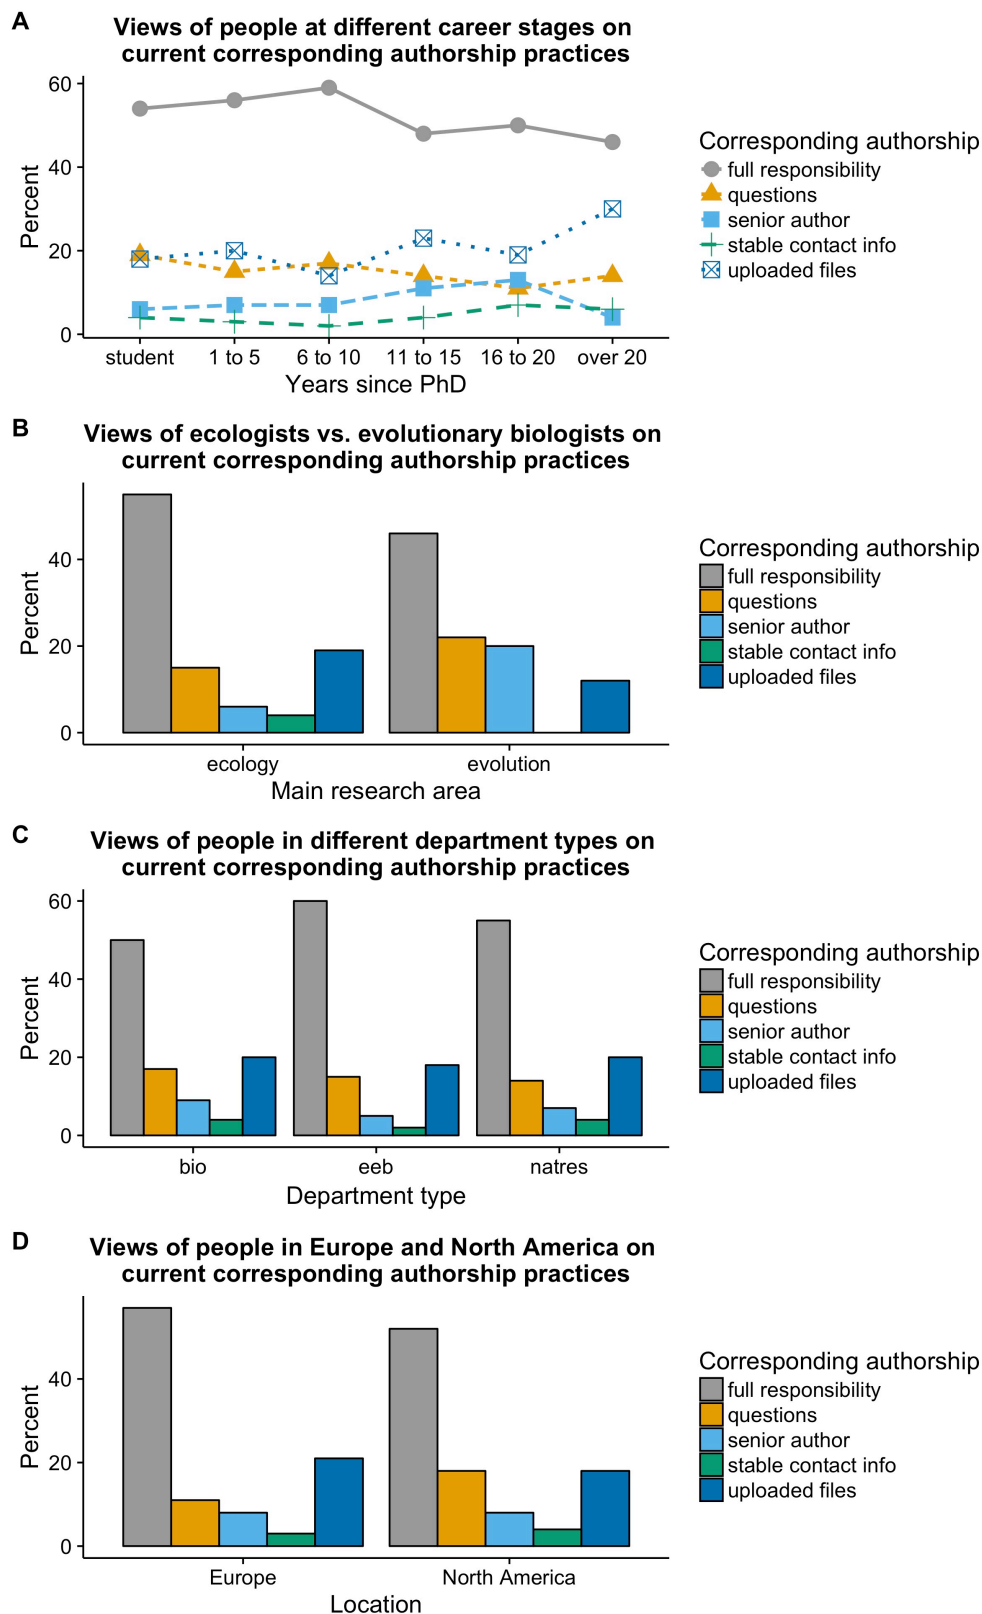

354  
 355 **Figure 4.** Influence of career stage, research area, department type, and geographic location on  
 356 views on current corresponding authorship practices.

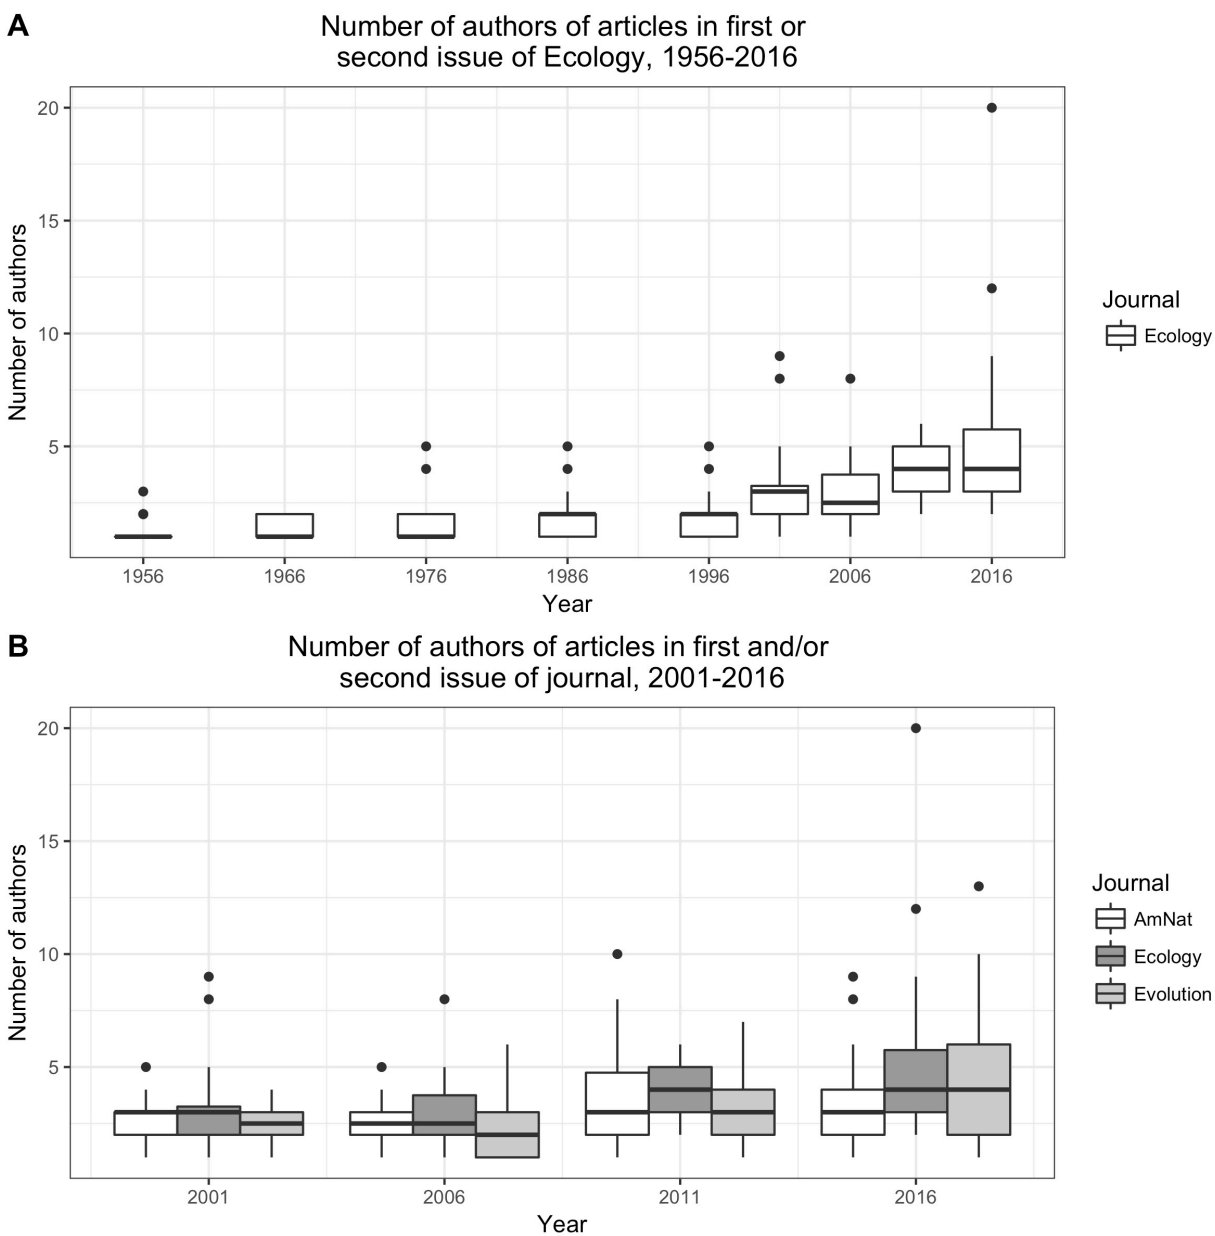

357  
358 **Figure 5.** Number of authors on papers in *American Naturalist*, *Ecology*, and *Evolution* over  
359 time. See methods for more information on which journal issues were analyzed. A) Data for  
360 *Ecology* for 1956-2016. B) Data for *American Naturalist*, *Ecology*, and *Evolution* for 2001-2016.  
361

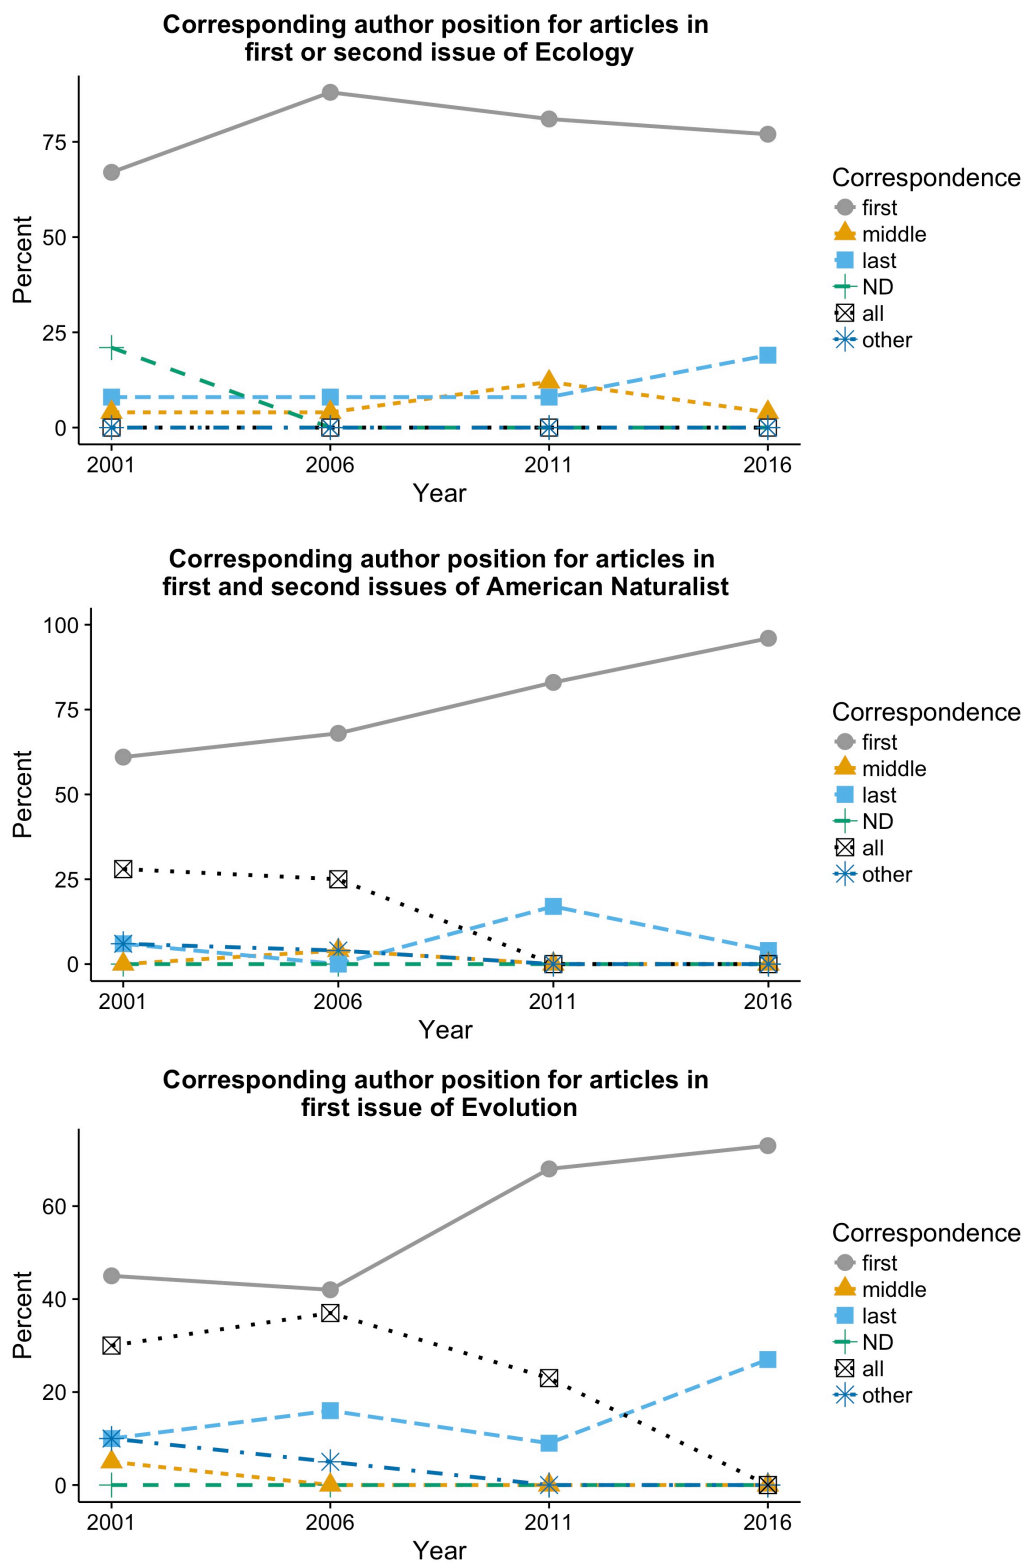

362  
363  
364  
365

**Figure 6.** Corresponding author position for articles in the first and/or second issue of the journals *American Naturalist*, *Ecology*, and *Evolution*.

## Supplementary Material

### Survey

The complete survey is given here.

1. For ecology papers, do you consider the last author to be the senior author?

- Yes
- No
- Not sure, but probably yes
- Not sure, but probably no
- It depends, but probably yes
- It depends, but probably no

2. Which of the following statements most closely matches the current norms in ecology in terms of who is corresponding author?

- The corresponding author is usually the person who uploaded the files (usually the first author)
- The corresponding author is usually the senior author
- The corresponding author is the person with the most stable contact info and/or internet access
- The corresponding author uploaded the files, managed the revisions and wrote the response to reviewers, and took responsibility for the paper after publication
- The corresponding author is the person that has taken responsibility for fielding questions about the paper post-publication

3. Which of the following statements would be the best practice in terms of who is corresponding author?

- The corresponding author should be whichever person uploaded the files (usually the first author)
- The corresponding author should be the senior author
- The corresponding author should be the person with the most stable contact info and/or internet access
- The corresponding author should be the person that has taken responsibility for fielding questions about the paper post-publication
- The corresponding author should be the person who uploaded the files, managed the revisions and wrote the response to reviewers, and took responsibility for the paper after publication

4. If someone includes a statement on his/her CV indicating they have used a first/last author emphasis, do you pay attention to that?

- Yes
- No
- I have never seen this, but would probably pay attention to it
- I have never seen this, but would probably not pay attention to it



5. What is your primary research area?

- Ecology (primarily field-based)
- Ecology (primarily wet-lab based, including molecular ecology)
- Ecology (primarily computational-based)
- Evolutionary biology (primarily molecular)
- Evolutionary biology (primarily organismal)
- Biology other than EEB
- Outside biology

6. Is your research primarily basic or applied?

- Basic
- Applied

7. How frequently do you conduct interdisciplinary research (i.e., publish research with co-authors outside of your discipline)?

- Never
- Rarely
- Sometimes
- Often
- Always

8. How many years post-PhD are you?

- 0
- 1-5
- 6-10
- 11-15
- 16-20
- >20
- I do not have a PhD and am not a current student

9. Where do you live?

- Africa
- Asia
- Australia
- Europe
- North America
- South America

10. Which best describes your current department?

- An EEB department (or similar)
- A biology department
- A natural resources department (or similar)
- other
